# Supplementary material for: Hypomagnesemia Is Associated with Increased Mortality among Peritoneal Dialysis Patients
Source: PubMed Central journal article supplement (PMC4811555; doi:10.1371/journal.pone.0152488), 2016-03-29
Supplement: pone.0152488.s001.pdf [file pone.0152488.s001.pdf]

| follow-up time | susvi ve | CVD | age | gende r | BMI   | etio logy | DM | MAP   | Hb   | Alb  | TC   | TG   | K    | Na    |
|----------------|----------|-----|-----|---------|-------|-----------|----|-------|------|------|------|------|------|-------|
| 98             | 0        | 0   | 33  | 1       | 18.8  | 7         | 0  | 73.33 | 76   | 28.4 | 3.3  | 1.09 | 5.11 | 131.3 |
| 4              | 1        | 1   | 71  | 2       | 17.58 | 1         | 0  | 93.67 | 54   | 18.6 | 2.91 | 0.63 | 3.02 | 137.2 |
| 4              | 1        | 1   | 86  | 1       | 18.42 | 1         | 0  | 78    | 69   | 11.5 | 4.73 | 1.35 | 2.29 | 129.3 |
| 4              | 1        | 0   | 82  | 1       | 19.84 | 7         | 0  | 94    | 113  | 30.5 | 3.86 | 0.92 | 3.73 | 139.6 |
| 4              | 0        | 0   | 83  | 1       | 19.78 | 4         | 0  | 86.67 | 96   | 23.1 | 5.42 | 0.76 | 4.33 | 141   |
| 5              | 1        | 1   | 73  | 1       | 19.49 | 4         | 0  | 63.33 | 118  | 13.6 | 4.04 | 1.01 | 3.63 | 132.9 |
| 5              | 0        | 0   | 52  | 1       | 25.06 | 1         | 1  | 89    | 67   | 30.3 | 2.06 | 0.62 | 3.77 | 144.6 |
| 5              | 0        | 0   | 36  | 1       | 15.94 | 1         | 0  | 104   | 129  | 36.8 | 7.13 | 1.14 | 6    | 142.8 |
| 6              | 0        | 0   | 39  | 2       | 17.6  | 1         | 0  | 106.7 | 97   | 32.2 | 4.76 | 1.98 | 4.07 | 142.1 |
| 6              | 0        | 0   | 44  | 2       | 24.91 | 6         | 0  | 100.7 | 71   | 36.1 | 7.32 | 2.17 | 3.03 | 142.2 |
| 6              | 0        | 0   | 45  | 2       | 18.83 | 1         | 0  | 117.3 | 70.2 | 30.7 | 4.93 | 1.38 | 5.41 | 140.6 |
| 6              | 0        | 0   | 48  | 1       | 22.86 | 2         | 0  | 96    | 115  | 32   | 4.25 | 1.52 | 4.01 | 146.4 |
| 6              | 1        | 0   | 73  | 2       | 21.64 | 1         | 0  | 102   | 104  | 38.6 | 5.42 | 2.54 | 4.68 | 142   |
| 6              | 1        | 1   | 53  | 2       | 20.96 | 1         | 0  | 83.33 | 95   | 15.2 | 3.38 | 1.11 | 5.12 | 138   |
| 6              | 0        | 0   | 73  | 1       | 25.95 | 1         | 0  | 93.33 | 109  | 37.5 | 5.04 | 1.52 | 5.15 | 147.4 |
| 6              | 1        | 0   | 70  | 1       | 27.99 | 3         | 0  | 83.33 | 118  | 33.1 | 4.04 | 2.32 | 3.84 | 141.1 |
| 7              | 0        | 0   | 64  | 1       | 20.28 | 2         | 1  | 101.3 | 90   | 26.6 | 5.94 | 1.51 | 4.72 | 146.7 |
| 7              | 0        | 0   | 50  | 1       | 18.54 | 2         | 1  | 96.67 | 117  | 24.4 | 3.51 | 0.38 | 3.59 | 141   |
| 7              | 0        | 0   | 32  | 1       | 19.15 | 1         | 0  | 103.3 | 80   | 31.7 | 5.59 | 1.24 | 4.33 | 140.1 |
| 7              | 0        | 0   | 53  | 1       | 27.34 | 1         | 0  | 100.7 | 76   | 32.3 | 3.63 | 1.33 | 3.87 | 147   |
| 7              | 0        | 0   | 68  | 2       | 21.48 | 1         | 0  | 98    | 90   | 37.1 | 4.99 | 1.47 | 3.93 | 145.6 |
| 7              | 0        | 0   | 58  | 2       | 22.96 | 4         | 0  | 103.3 | 92   | 27.1 | 5.79 | 8.71 | 2.81 | 139.1 |
| 7              | 0        | 0   | 32  | 1       | 20.76 | 1         | 0  | 94    | 118  | 34.9 | 3.54 | 0.99 | 4.15 | 142.8 |
| 7              | 0        | 0   | 59  | 2       | 20.78 | 2         | 1  | 90    | 126  | 36.7 | 4.31 | 0.27 | 4.61 | 148.1 |
| 8              | 1        | 1   | 52  | 1       | 20.31 | 1         | 0  | 98    | 69   | 29.1 | 4    | 0.83 | 4.65 | 141.9 |
| 8              | 0        | 0   | 81  | 2       | 15.4  | 1         | 0  | 85.33 | 120  | 24.6 | 5.78 | 1.02 | 3.39 | 143.9 |
| 8              | 0        | 0   | 76  | 1       | 20.86 | 2         | 1  | 91.67 | 107  | 29.9 | 4.74 | 0.94 | 4.48 | 140.8 |
| 8              | 0        | 0   | 42  | 2       | 24.65 | 2         | 1  | 109.3 | 112  | 27.3 | 8.63 | 1.78 | 3.89 | 143.9 |
| 8              | 1        | 1   | 86  | 2       | 23.44 | 1         | 0  | 67.33 | 73   | 24   | 4.82 | 1.27 | 3.34 | 142.6 |
| 9              | 0        | 0   | 48  | 1       | 19.14 | 1         | 0  | 113.7 | 106  | 32.9 | 3.93 | 2.05 | 4.45 | 145.7 |
| 9              | 0        | 0   | 56  | 1       | 24.62 | 1         | 0  | 96.67 | 92   | 31.6 | 5.5  | 2.82 | 4.8  | 141   |
| 9              | 1        | 0   | 52  | 1       | 22.15 | 7         | 1  | 90    | 87   | 25.2 | 5.75 | 5.71 | 2.92 | 138.8 |
| 9              | 0        | 0   | 54  | 1       | 21.26 | 1         | 0  | 100   | 71   | 24.2 | 4.94 | 3.45 | 4    | 138   |
| 9              | 0        | 0   | 53  | 2       | 23.23 | 1         | 1  | 106.7 | 101  | 37.8 | 4.65 | 2.06 | 3.66 | 143.1 |
| 10             | 0        | 0   | 30  | 1       | 19.03 | 1         | 0  | 115   | 53   | 28.3 | 5.06 | 2.47 | 4.9  | 142   |
| 10             | 1        | 0   | 47  | 2       | 19.63 | 2         | 1  | 90.67 | 76   | 18.7 | 7.18 | 5.83 | 4.68 | 140.4 |
| 10             | 1        | 1   | 64  | 2       | 28.35 | 2         | 1  | 106.7 | 80   | 27.1 | 4.81 | 0.85 | 6.86 | 137   |
| 11             | 1        | 1   | 72  | 2       | 19.53 | 2         | 1  | 101.7 | 94   | 20.2 | 4.92 | 1.96 | 2.94 | 139.1 |
| 11             | 0        | 0   | 56  | 1       | 23.88 | 2         | 1  | 99.67 | 133  | 31.8 | 3.23 | 1.13 | 3.05 | 145.2 |
| 11             | 0        | 0   | 74  | 1       | 19.03 | 3         | 0  | 100.7 | 90   | 31.9 | 5.28 | 0.72 | 4.08 | 141.9 |
| 11             | 1        | 0   | 76  | 1       | 17.76 | 3         | 0  | 80    | 88   | 25.5 | 4.17 | 0.92 | 5.8  | 136   |
| 11             | 0        | 0   | 80  | 1       | 21.91 | 3         | 0  | 88    | 117  | 32.8 | 4.45 | 1.07 | 4.7  | 140.7 |
| 11             | 0        | 0   | 43  | 2       | 17.19 | 1         | 0  | 93.33 | 111  | 29.2 | 5.28 | 1.14 | 4.9  | 140.4 |
| 11             | 0        | 0   | 29  | 2       | 17.77 | 12        | 0  | 108   | 101  | 38.1 | 6.13 | 1.87 | 4.49 | 144.3 |
| 12             | 1        | 0   | 76  | 1       | 23.62 | 1         | 0  | 102.7 | 62   | 22.6 | 4.66 | 2.39 | 4.19 | 142.6 |
| 12             | 0        | 0   | 60  | 2       | 18.42 | 1         | 0  | 95    | 101  | 37.1 | 5.67 | 1.8  | 4.56 | 143.5 |
| 12             | 0        | 0   | 76  | 2       | 17.22 | 1         | 0  | 93.67 | 146  | 29.6 | 5.2  | 1.54 | 4.86 | 139.5 |
| 12             | 0        | 0   | 54  | 2       | 18.53 | 1         | 0  | 106.7 | 116  | 34.4 | 6.1  | 3.6  | 3.6  | 143.4 |
| 13             | 0        | 0   | 71  | 1       | 20.76 | 10        | 0  | 83.33 | 119  | 31.6 | 4.45 | 1.63 | 3.89 | 143   |
| 14             | 0        | 0   | 85  | 2       | 20    | 1         | 0  | 88    | 110  | 20.8 | 5.24 | 0.66 | 2.6  | 141.3 |
| 14             | 1        | 0   | 53  | 1       | 23.24 | 3         | 0  | 88.67 | 74   | 29.2 | 3.83 | 0.69 | 4.26 | 136.8 |
| 14             | 1        | 1   | 83  | 2       | 24.14 | 3         | 0  | 76.67 | 121  | 31.4 | 4.95 | 1.47 | 4.4  | 147   |
| 15             | 1        | 1   | 58  | 2       | 23.31 | 6         | 0  | 90    | 86   | 33.4 | 5.67 | 1.56 | 5.12 | 133.7 |

| follow-up time | susvi ve | CVD | age | gende r | BMI   | etio logy | DM | MAP   | Hb  | Alb  | TC   | TG   | K    | Na    |
|----------------|----------|-----|-----|---------|-------|-----------|----|-------|-----|------|------|------|------|-------|
| 15             | 1        | 1   | 72  | 1       | 21.99 | 7         | 0  | 118.7 | 56  | 18.3 | 3.5  | 0.95 | 4.5  | 139.8 |
| 15             | 0        | 0   | 56  | 1       | 19.1  | 4         | 0  | 114.3 | 116 | 27.2 | 5.11 | 0.51 | 3.97 | 142.3 |
| 15             | 0        | 0   | 37  | 2       | 19.14 | 1         | 0  | 108   | 106 | 29   | 4.56 | 2.26 | 3.27 | 141.3 |
| 16             | 0        | 0   | 82  | 1       | 23.53 | 1         | 0  | 104.7 | 89  | 24.9 | 3.38 | 1.03 | 4.16 | 138.9 |
| 16             | 0        | 0   | 52  | 1       | 25.93 | 2         | 1  | 106   | 65  | 28.3 | 3.79 | 3.4  | 4.39 | 139.5 |
| 16             | 0        | 0   | 74  | 1       | 22.05 | 7         | 0  | 83.33 | 96  | 28.3 | 4.31 | 1.1  | 4.31 | 137.9 |
| 16             | 0        | 0   | 46  | 2       | 22.19 | 1         | 0  | 102.7 | 110 | 30.7 | 4.87 | 1.51 | 4.29 | 139.4 |
| 16             | 0        | 0   | 42  | 2       | 22.22 | 1         | 0  | 101   | 82  | 28.7 | 5.31 | 3.55 | 3.51 | 141.8 |
| 16             | 0        | 0   | 60  | 1       | 26.47 | 2         | 1  | 85    | 116 | 33.4 | 3.78 | 1.5  | 4.98 | 142   |
| 16             | 1        | 0   | 44  | 2       | 21.3  | 1         | 0  | 93.33 | 113 | 33.5 | 3.63 | 1.56 | 5.31 | 139.1 |
| 16             | 0        | 0   | 47  | 2       | 20.55 | 1         | 0  | 111   | 92  | 28.7 | 3.41 | 1.42 | 4.05 | 140.5 |
| 16             | 0        | 0   | 45  | 2       | 21.88 | 1         | 0  | 95.67 | 86  | 29.5 | 4.87 | 0.87 | 3.54 | 142.4 |
| 16             | 0        | 0   | 21  | 1       | 19.16 | 1         | 0  | 88    | 120 | 31.9 | 4.83 | 1    | 4.37 | 137.6 |
| 16             | 0        | 0   | 80  | 1       | 19.84 | 2         | 0  | 88.67 | 128 | 33.6 | 3.26 | 1.33 | 4.45 | 140.4 |
| 17             | 0        | 0   | 52  | 1       | 20.83 | 7         | 0  | 100.7 | 95  | 25.3 | 4.2  | 0.78 | 3.31 | 142.2 |
| 17             | 0        | 0   | 62  | 1       | 22.77 | 1         | 1  | 102.3 | 83  | 28.7 | 5.28 | 1.65 | 4.99 | 138.5 |
| 17             | 0        | 0   | 56  | 2       | 19.78 | 1         | 0  | 110   | 93  | 26.1 | 4.6  | 1.46 | 3.69 | 139   |
| 17             | 0        | 0   | 58  | 1       | 23.23 | 1         | 0  | 96.67 | 85  | 27.1 | 4.5  | 0.82 | 4.23 | 138.3 |
| 17             | 0        | 0   | 64  | 1       | 22.49 | 3         | 0  | 76.67 | 113 | 25.4 | 3.92 | 4.76 | 3.58 | 143.5 |
| 18             | 0        | 0   | 67  | 1       | 21.11 | 7         | 0  | 116.7 | 100 | 24.4 | 5.61 | 1.12 | 3.2  | 143.2 |
| 18             | 0        | 0   | 68  | 1       | 28.03 | 2         | 1  | 87.33 | 91  | 28   | 3    | 1.25 | 3.32 | 143.1 |
| 18             | 0        | 0   | 44  | 1       | 29.41 | 1         | 0  | 110   | 114 | 33.5 | 6.14 | 2.56 | 4.06 | 142.5 |
| 18             | 0        | 0   | 45  | 1       | 22.49 | 1         | 0  | 96.67 | 98  | 30.1 | 4.61 | 2.77 | 3.28 | 124.7 |
| 18             | 0        | 0   | 69  | 2       | 31.25 | 6         | 0  | 113.7 | 124 | 27   | 5.5  | 3.61 | 3.45 | 140.8 |
| 18             | 0        | 0   | 72  | 1       | 25.4  | 1         | 0  | 86.67 | 141 | 36.3 | 6.74 | 2.73 | 4.67 | 141.5 |
| 18             | 0        | 0   | 31  | 1       | 22.04 | 1         | 0  | 106.7 | 106 | 38.4 | 6.83 | 2.24 | 5.36 | 136.8 |
| 19             | 0        | 0   | 64  | 1       | 20.76 | 1         | 1  | 105.3 | 71  | 28.8 | 3.81 | 0.8  | 4.56 | 152.6 |
| 19             | 0        | 0   | 70  | 1       | 22.84 | 1         | 0  | 98.67 | 86  | 27.5 | 3.79 | 0.79 | 5.21 | 139.9 |
| 19             | 1        | 1   | 82  | 2       | 21.37 | 2         | 1  | 95.33 | 131 | 25.7 | 2.85 | 1.47 | 4.27 | 141.7 |
| 19             | 0        | 0   | 51  | 1       | 23.56 | 3         | 0  | 110   | 105 | 31.6 | 5.3  | 5.69 | 3.43 | 140   |
| 20             | 1        | 1   | 38  | 1       | 22.49 | 1         | 0  | 92    | 52  | 21.4 | 3.86 | 1.13 | 4.48 | 141.3 |
| 20             | 0        | 0   | 44  | 2       | 25    | 1         | 0  | 106.7 | 97  | 28.9 | 4.63 | 4.44 | 4.65 | 147   |
| 20             | 0        | 0   | 86  | 2       | 17.78 | 3         | 0  | 84    | 101 | 21.1 | 5.14 | 0.82 | 3.42 | 142.8 |
| 20             | 0        | 0   | 61  | 2       | 20.96 | 4         | 0  | 94    | 108 | 37.8 | 6.4  | 3.48 | 4.11 | 146.7 |
| 20             | 0        | 0   | 88  | 1       | 22.31 | 3         | 1  | 86.67 | 92  | 30   | 3.73 | 0.65 | 3.87 | 138.9 |
| 21             | 0        | 0   | 46  | 1       | 21.11 | 1         | 0  | 118.7 | 144 | 30.2 | 4.72 | 1.54 | 4.8  | 139.9 |
| 21             | 0        | 0   | 40  | 2       | 18.49 | 1         | 0  | 96    | 137 | 30   | 4.66 | 0.97 | 4.61 | 144.8 |
| 21             | 0        | 0   | 30  | 2       | 23.23 | 1         | 0  | 90    | 148 | 40.1 | 7.53 | 2.56 | 4.03 | 139.5 |
| 22             | 1        | 1   | 65  | 2       | 20.03 | 2         | 1  | 101.7 | 104 | 21.3 | 4.39 | 0.93 | 4.26 | 133.5 |
| 22             | 0        | 0   | 48  | 2       | 21.34 | 1         | 0  | 94.67 | 100 | 33.8 | 5.58 | 1.45 | 4.18 | 142   |
| 22             | 0        | 0   | 68  | 2       | 25.28 | 3         | 0  | 96.67 | 101 | 29.4 | 6.13 | 2.06 | 3.71 | 143.7 |
| 22             | 0        | 0   | 50  | 2       | 18.25 | 1         | 0  | 101.3 | 111 | 34.5 | 4.78 | 1    | 5.34 | 145.2 |
| 22             | 0        | 0   | 48  | 2       | 21.91 | 1         | 0  | 102.3 | 83  | 29.9 | 2.68 | 0.63 | 4.02 | 138.6 |
| 23             | 0        | 0   | 59  | 1       | 16.07 | 6         | 0  | 108.3 | 91  | 26.6 | 3.47 | 0.86 | 3.98 | 143.9 |
| 23             | 1        | 0   | 73  | 1       | 24.22 | 2         | 1  | 99.33 | 121 | 30   | 3.72 | 0.83 | 3.77 | 144.8 |
| 23             | 0        | 0   | 87  | 2       | 23.73 | 1         | 1  | 90    | 98  | 28.8 | 3.46 | 1.38 | 4.89 | 141.6 |
| 24             | 0        | 0   | 51  | 1       | 25.61 | 1         | 0  | 102.7 | 73  | 26.5 | 4.75 | 1.27 | 5.36 | 144.7 |
| 24             | 1        | 1   | 33  | 2       | 21.48 | 1         | 0  | 93.67 | 105 | 25.9 | 4.41 | 1.21 | 3.93 | 136.2 |
| 24             | 0        | 0   | 65  | 2       | 21.64 | 2         | 1  | 91.67 | 89  | 33.3 | 5.57 | 2.41 | 4.27 | 144.7 |
| 24             | 0        | 0   | 34  | 2       | 23.44 | 1         | 0  | 96    | 95  | 36   | 4.67 | 1.66 | 5.11 | 137.1 |
| 25             | 0        | 0   | 59  | 1       | 22.03 | 1         | 1  | 96.67 | 95  | 31.1 | 3.37 | 1.22 | 5.65 | 141.4 |
| 25             | 1        | 1   | 63  | 2       | 26.17 | 2         | 1  | 47    | 84  | 29.2 | 2.92 | 0.98 | 5.29 | 142.8 |
| 25             | 0        | 0   | 36  | 1       | 20.96 | 1         | 0  | 130   | 111 | 32.2 | 6.18 | 0.79 | 4.13 | 136.5 |

| follow-up time | susvi ve | CVD | age | gende r | BMI   | etio logy | DM | MAP   | Hb  | Alb  | TC   | TG   | K    | Na    |
|----------------|----------|-----|-----|---------|-------|-----------|----|-------|-----|------|------|------|------|-------|
| 25             | 0        | 0   | 50  | 2       | 19.53 | 1         | 0  | 90.67 | 85  | 30.2 | 4.44 | 1.76 | 3.63 | 142.9 |
| 25             | 1        | 0   | 75  | 1       | 23.56 | 2         | 1  | 101.7 | 102 | 16   | 6.08 | 1.27 | 3.85 | 143.1 |
| 25             | 0        | 0   | 52  | 1       | 20.76 | 1         | 0  | 85.67 | 107 | 25.7 | 4.31 | 0.58 | 3.84 | 139.3 |
| 26             | 0        | 0   | 44  | 2       | 25.07 | 2         | 1  | 96.67 | 75  | 19.6 | 5.04 | 1.36 | 4.9  | 136   |
| 26             | 0        | 0   | 86  | 2       | 20.27 | 1         | 0  | 100   | 98  | 26.6 | 5.95 | 3.25 | 4.94 | 133.2 |
| 26             | 1        | 0   | 65  | 2       | 23.43 | 2         | 1  | 84    | 112 | 23.4 | 5.39 | 1.57 | 2.64 | 137.3 |
| 26             | 0        | 0   | 29  | 2       | 19.19 | 1         | 0  | 91.67 | 106 | 32.1 | 4.61 | 1.31 | 4.55 | 139   |
| 26             | 0        | 0   | 48  | 2       | 22.06 | 2         | 1  | 100   | 101 | 23.4 | 6.05 | 0.89 | 3.68 | 140.9 |
| 26             | 0        | 0   | 38  | 2       | 18    | 1         | 0  | 102.3 | 119 | 38   | 4.06 | 1.22 | 3.78 | 136.4 |
| 27             | 1        | 1   | 93  | 1       | 20.2  | 3         | 0  | 96.67 | 89  | 29.4 | 3.94 | 1.87 | 2.71 | 142.8 |
| 27             | 0        | 0   | 20  | 1       | 34.15 | 1         | 0  | 93.33 | 94  | 37.5 | 6.39 | 3.21 | 5.37 | 140.3 |
| 27             | 0        | 0   | 38  | 1       | 24.8  | 1         | 0  | 103.3 | 81  | 27.1 | 2.98 | 1.02 | 4.6  | 143   |
| 27             | 0        | 0   | 77  | 2       | 21    | 1         | 0  | 100   | 103 | 30   | 3.26 | 1.49 | 4.6  | 140   |
| 27             | 0        | 0   | 23  | 2       | 18.83 | 1         | 0  | 100   | 65  | 30.9 | 3.84 | 0.75 | 3.57 | 139.6 |
| 27             | 1        | 1   | 79  | 2       | 19.53 | 2         | 1  | 84    | 101 | 24.7 | 4.59 | 0.56 | 3.35 | 134.8 |
| 28             | 0        | 0   | 41  | 1       | 24.22 | 1         | 0  | 90.67 | 106 | 31.7 | 4.19 | 1.5  | 4.2  | 141   |
| 28             | 0        | 0   | 72  | 1       | 22.68 | 7         | 0  | 99.33 | 88  | 22.2 | 5.49 | 1.45 | 4.4  | 140   |
| 28             | 1        | 1   | 68  | 1       | 25.09 | 2         | 1  | 83.33 | 100 | 20.2 | 3.4  | 0.82 | 4.15 | 140.2 |
| 28             | 0        | 0   | 58  | 1       | 19.55 | 2         | 1  | 120   | 88  | 30.4 | 4.88 | 2.17 | 5.3  | 146   |
| 29             | 0        | 0   | 51  | 2       | 21.58 | 7         | 0  | 105   | 86  | 31.8 | 4.62 | 1.92 | 5    | 140   |
| 29             | 0        | 0   | 72  | 2       | 14.22 | 1         | 0  | 83.33 | 107 | 26.8 | 4.28 | 1.06 | 4.1  | 138   |
| 29             | 1        | 0   | 77  | 1       | 18.34 | 1         | 0  | 126.7 | 68  | 27.4 | 4.46 | 1.88 | 5.16 | 140.3 |
| 30             | 0        | 0   | 33  | 1       | 24.84 | 1         | 0  | 100   | 111 | 38.1 | 4.16 | 2.21 | 4.3  | 145   |
| 30             | 1        | 0   | 67  | 2       | 20.83 | 3         | 1  | 101.3 | 103 | 22   | 5.91 | 2.13 | 3.9  | 143   |
| 30             | 0        | 0   | 45  | 2       | 19.53 | 1         | 0  | 111.7 | 106 | 27.8 | 5.04 | 9    | 4.5  | 139   |
| 30             | 0        | 0   | 49  | 1       | 22.49 | 9         | 0  | 112.7 | 111 | 31.2 | 5.84 | 1.89 | 4.3  | 140   |
| 30             | 0        | 0   | 44  | 1       | 18.56 | 7         | 0  | 92    | 75  | 17.9 | 3.7  | 1.38 | 3.17 | 137   |
| 30             | 0        | 0   | 27  | 1       | 18.56 | 1         | 0  | 99    | 118 | 27.2 | 4.18 | 0.89 | 5    | 140   |
| 31             | 0        | 0   | 58  | 1       | 22.04 | 1         | 0  | 123.3 | 67  | 24   | 4.26 | 1.37 | 3    | 140   |
| 31             | 0        | 0   | 60  | 1       | 20.9  | 1         | 0  | 86.33 | 88  | 23.3 | 4.64 | 1.08 | 3.97 | 139.3 |
| 32             | 1        | 1   | 39  | 2       | 17.09 | 1         | 0  | 100   | 111 | 26.3 | 7.26 | 1.41 | 4.08 | 141.1 |
| 32             | 0        | 0   | 51  | 2       | 22.04 | 1         | 0  | 90.33 | 91  | 22.1 | 4.91 | 1.18 | 4.2  | 146   |
| 32             | 1        | 0   | 76  | 1       | 14.88 | 2         | 1  | 86.67 | 73  | 16.2 | 3.53 | 1.25 | 3.22 | 132.6 |
| 32             | 0        | 0   | 56  | 1       | 21.22 | 4         | 0  | 106.7 | 106 | 35.5 | 5.73 | 2.88 | 4.37 | 141.4 |
| 32             | 0        | 0   | 78  | 2       | 18.43 | 1         | 0  | 73.67 | 103 | 28.9 | 3.56 | 1.08 | 4.7  | 144   |
| 32             | 0        | 0   | 76  | 1       | 20.76 | 2         | 1  | 105.3 | 73  | 18.1 | 4.69 | 1.24 | 3.9  | 138   |
| 33             | 1        | 0   | 71  | 2       | 18.02 | 7         | 1  | 122   | 56  | 18.5 | 3.87 | 1.12 | 4.16 | 133.5 |
| 33             | 0        | 0   | 78  | 2       | 24.2  | 2         | 1  | 101.3 | 120 | 31.6 | 3.27 | 0.49 | 5.16 | 140.6 |
| 33             | 0        | 0   | 85  | 1       | 21.09 | 7         | 0  | 96.67 | 111 | 27   | 4.77 | 2.14 | 3.7  | 144   |
| 34             | 0        | 0   | 57  | 1       | 24.17 | 1         | 1  | 93.33 | 101 | 33.6 | 4.54 | 1.4  | 3.97 | 139.8 |
| 34             | 0        | 0   | 52  | 2       | 26.17 | 1         | 0  | 81    | 69  | 31.3 | 4.85 | 3.3  | 3.34 | 138.7 |
| 35             | 0        | 0   | 50  | 1       | 24.39 | 2         | 1  | 95.33 | 98  | 29.5 | 4.9  | 1.46 | 4.71 | 144.7 |
| 35             | 0        | 0   | 41  | 2       | 18.73 | 1         | 0  | 74.67 | 92  | 28.3 | 5.73 | 1.93 | 3.41 | 136   |
| 36             | 1        | 0   | 71  | 1       | 23.12 | 3         | 1  | 103.3 | 92  | 22.7 | 4.83 | 0.84 | 4    | 140.6 |
| 36             | 0        | 0   | 82  | 2       | 20.13 | 3         | 0  | 76.67 | 122 | 28.4 | 4.09 | 1.02 | 3.4  | 130.6 |
| 36             | 0        | 0   | 50  | 2       | 19.53 | 1         | 0  | 80    | 129 | 32   | 8.17 | 1.29 | 3.18 | 131.2 |
| 36             | 0        | 0   | 29  | 1       | 18.45 | 1         | 0  | 89.33 | 117 | 37.7 | 4    | 0.8  | 3.91 | 137.3 |
| 36             | 0        | 0   | 55  | 2       | 25.39 | 1         | 0  | 97.33 | 78  | 30.6 | 6.45 | 3.41 | 4.65 | 134.9 |
| 37             | 0        | 0   | 38  | 1       | 22.49 | 1         | 0  | 100   | 88  | 31.9 | 6.77 | 1.75 | 5.11 | 138.1 |
| 37             | 0        | 0   | 43  | 1       | 24.02 | 1         | 0  | 110   | 90  | 36.1 | 5.75 | 2.91 | 3.88 | 138   |
| 37             | 0        | 0   | 78  | 2       | 22.31 | 3         | 0  | 82.33 | 81  | 24.8 | 2.41 | 0.84 | 5.11 | 136.9 |
| 38             | 0        | 0   | 83  | 1       | 22.49 | 7         | 0  | 76.33 | 91  | 25.9 | 3.16 | 0.42 | 2.79 | 137   |
| 38             | 0        | 0   | 56  | 1       | 23.74 | 1         | 0  | 86.67 | 97  | 23.6 | 3.83 | 1.14 | 2.61 | 131.8 |

| follow-up time | susvi ve | CVD | age | gende r | BMI   | etio logy | DM | MAP   | Hb  | Alb  | TC   | TG   | K    | Na    |
|----------------|----------|-----|-----|---------|-------|-----------|----|-------|-----|------|------|------|------|-------|
| 38             | 0        | 0   | 49  | 1       | 20.87 | 1         | 0  | 83.33 | 81  | 25.6 | 7.13 | 5.52 | 4.87 | 136.3 |
| 38             | 0        | 0   | 43  | 1       | 27.68 | 1         | 0  | 98.67 | 122 | 38.3 | 4.11 | 0.92 | 3.88 | 139.7 |
| 39             | 1        | 1   | 79  | 1       | 20.31 | 3         | 1  | 96.67 | 85  | 26.2 | 4.98 | 1.73 | 3.73 | 140.7 |
| 39             | 0        | 0   | 69  | 1       | 20.48 | 1         | 0  | 92    | 95  | 23.9 | 4.44 | 0.71 | 4.04 | 140.4 |
| 39             | 0        | 0   | 45  | 1       | 27.36 | 2         | 1  | 113.3 | 99  | 27.1 | 5.34 | 1.3  | 3.23 | 143.2 |
| 40             | 0        | 0   | 48  | 2       | 20.58 | 1         | 0  | 93.33 | 105 | 31.6 | 6.96 | 2.03 | 3.58 | 134.8 |
| 41             | 1        | 1   | 67  | 1       | 21.45 | 1         | 0  | 95    | 114 | 21.9 | 5.62 | 0.81 | 4.35 | 139   |
| 41             | 0        | 0   | 50  | 1       | 15.56 | 7         | 0  | 80    | 97  | 26.3 | 4.09 | 1.19 | 2.93 | 137.9 |
| 42             | 0        | 0   | 72  | 2       | 16.37 | 1         | 0  | 91    | 126 | 28.6 | 3.66 | 0.7  | 4.36 | 141   |
| 42             | 0        | 0   | 48  | 1       | 26.99 | 1         | 0  | 89.33 | 89  | 26.3 | 4.81 | 1.07 | 4.57 | 137.5 |
| 42             | 0        | 0   | 69  | 1       | 23.18 | 1         | 0  | 94.33 | 85  | 23.7 | 4.04 | 1.46 | 3.88 | 137.9 |
| 42             | 0        | 0   | 52  | 2       | 21.37 | 1         | 0  | 113.3 | 75  | 34   | 4.36 | 1.04 | 4.78 | 139.4 |
| 43             | 0        | 0   | 66  | 1       | 24.09 | 1         | 0  | 84    | 122 | 28.4 | 4.51 | 0.7  | 4.03 | 138.4 |
| 43             | 0        | 0   | 41  | 1       | 24.69 | 1         | 0  | 95.33 | 130 | 30.1 | 4.25 | 0.99 | 4.3  | 141   |
| 44             | 0        | 0   | 29  | 1       | 18.48 | 1         | 0  | 96.67 | 103 | 30.1 | 4.02 | 1.37 | 4.29 | 139.5 |
| 44             | 1        | 1   | 75  | 2       | 15.82 | 1         | 0  | 103.3 | 75  | 29.9 | 4.81 | 0.7  | 5.37 | 139.6 |
| 44             | 1        | 1   | 81  | 2       | 22.89 | 2         | 0  | 93.33 | 97  | 21.3 | 4.51 | 1.82 | 2.14 | 138.6 |
| 45             | 1        | 1   | 69  | 2       | 28.72 | 3         | 1  | 93.33 | 96  | 32.3 | 6.49 | 3.45 | 4.84 | 138.9 |
| 45             | 1        | 0   | 82  | 1       | 19.14 | 1         | 0  | 90.67 | 104 | 27.7 | 3.16 | 0.59 | 3.58 | 136.9 |
| 46             | 1        | 1   | 76  | 2       | 18.61 | 7         | 0  | 95.33 | 55  | 15.9 | 6.01 | 0.93 | 2.58 | 138.2 |
| 46             | 1        | 0   | 74  | 1       | 20.59 | 1         | 0  | 88.33 | 134 | 38.6 | 4.52 | 1.47 | 4.41 | 132.5 |
| 46             | 0        | 0   | 63  | 2       | 26.78 | 1         | 0  | 98.67 | 94  | 31.4 | 3.53 | 1.54 | 4.1  | 135.6 |
| 46             | 1        | 1   | 92  | 2       | 24.13 | 2         | 1  | 96.67 | 87  | 21.9 | 2.93 | 2.74 | 1.97 | 134.5 |
| 46             | 0        | 0   | 61  | 1       | 21.63 | 1         | 0  | 93.33 | 88  | 27.9 | 4.01 | 0.58 | 4.43 | 137   |
| 46             | 0        | 0   | 93  | 1       | 21.45 | 1         | 0  | 113.3 | 103 | 32.3 | 4.84 | 1.52 | 4.06 | 138.8 |
| 47             | 0        | 0   | 51  | 1       | 21.16 | 1         | 0  | 120   | 71  | 28.2 | 3.51 | 1.31 | 4.91 | 132.1 |
| 48             | 0        | 0   | 56  | 2       | 24.39 | 1         | 0  | 83.33 | 85  | 27.1 | 5.06 | 1.24 | 3.79 | 138.1 |
| 49             | 0        | 0   | 62  | 1       | 26.22 | 1         | 0  | 86.67 | 84  | 25   | 4.46 | 2.96 | 3.46 | 141.6 |
| 50             | 1        | 1   | 82  | 2       | 20.28 | 3         | 0  | 86.67 | 95  | 32.2 | 4.6  | 1.41 | 4.96 | 138.8 |
| 50             | 0        | 0   | 51  | 2       | 21.06 | 1         | 0  | 96.67 | 89  | 28   | 2.86 | 1.23 | 3.32 | 139.1 |
| 50             | 1        | 0   | 80  | 1       | 23.99 | 1         | 1  | 90.67 | 96  | 34.3 | 4    | 0.82 | 3.61 | 139.9 |
| 51             | 0        | 0   | 58  | 1       | 23.53 | 8         | 0  | 88.67 | 71  | 26.7 | 3.58 | 0.76 | 4.03 | 141.6 |
| 51             | 0        | 0   | 59  | 2       | 23.23 | 2         | 1  | 101.3 | 100 | 31.5 | 4.47 | 3.52 | 3.26 | 138.9 |
| 51             | 0        | 0   | 27  | 1       | 23.03 | 1         | 0  | 87.33 | 123 | 32.3 | 5.36 | 2.53 | 5.3  | 140.4 |
| 52             | 0        | 0   | 58  | 1       | 25.01 | 1         | 0  | 80    | 82  | 21.9 | 2.09 | 1.08 | 5.25 | 139.2 |
| 52             | 0        | 0   | 74  | 1       | 17.65 | 2         | 1  | 126.7 | 76  | 22.6 | 5.93 | 0.78 | 4.21 | 138.5 |
| 52             | 1        | 1   | 86  | 2       | 23.11 | 3         | 0  | 84    | 74  | 22.1 | 3.97 | 0.65 | 2.81 | 136.3 |
| 53             | 1        | 1   | 43  | 1       | 21.8  | 7         | 0  | 83.33 | 94  | 17.3 | 5.34 | 0.71 | 3.54 | 140.2 |
| 54             | 0        | 0   | 49  | 2       | 20.81 | 1         | 0  | 120   | 89  | 27.6 | 6.7  | 1.69 | 3.61 | 136.3 |
| 54             | 1        | 1   | 53  | 1       | 21.8  | 2         | 1  | 100   | 70  | 33.9 | 4.66 | 1.13 | 5.59 | 147.8 |
| 54             | 0        | 0   | 37  | 2       | 19.53 | 1         | 0  | 84.67 | 109 | 38.6 | 5.5  | 8.33 | 3.57 | 139.6 |
| 55             | 0        | 0   | 40  | 2       | 18.43 | 1         | 0  | 79.67 | 125 | 37.2 | 4.88 | 1.63 | 3.28 | 135.6 |
| 55             | 0        | 0   | 34  | 1       | 18.25 | 1         | 0  | 99    | 98  | 31.6 | 5.79 | 2.05 | 6.04 | 132.4 |
| 56             | 0        | 0   | 64  | 2       | 27.34 | 2         | 1  | 90.33 | 105 | 30.5 | 7.58 | 3.01 | 4.8  | 134   |
| 57             | 0        | 0   | 56  | 2       | 17.78 | 1         | 0  | 102   | 105 | 33   | 5.19 | 2.25 | 3.87 | 139.5 |
| 58             | 0        | 0   | 54  | 1       | 26.3  | 1         | 0  | 113.3 | 84  | 26.3 | 4.43 | 0.54 | 3.24 | 140.3 |
| 60             | 0        | 0   | 78  | 1       | 24.84 | 8         | 1  | 77.67 | 102 | 36.2 | 3.83 | 1.6  | 4.35 | 143.1 |
| 60             | 0        | 0   | 53  | 2       | 17.31 | 4         | 0  | 83.33 | 80  | 31.9 | 4.41 | 1.44 | 4.47 | 143   |
| 61             | 1        | 0   | 56  | 1       | 22.2  | 2         | 1  | 96.67 | 93  | 27.7 | 5.18 | 1.2  | 3.62 | 137.8 |
| 61             | 0        | 0   | 50  | 2       | 19.56 | 2         | 1  | 107.7 | 117 | 28.4 | 4.16 | 1.13 | 4.93 | 136.9 |
| 61             | 0        | 0   | 67  | 2       | 23.44 | 2         | 1  | 74.67 | 93  | 26.1 | 5.44 | 3.71 | 3.92 | 135.5 |
| 62             | 0        | 0   | 49  | 1       | 20.76 | 4         | 0  | 86.67 | 93  | 33.8 | 3.37 | 0.78 | 5.52 | 141.4 |
| 62             | 1        | 0   | 62  | 1       | 26.89 | 2         | 1  | 97.33 | 82  | 25.6 | 7.21 | 1.28 | 4.33 | 139.7 |

| follow-up time | susvi ve | CVD | age | gende r | BMI   | etio logy | DM | MAP   | Hb  | Alb  | TC   | TG   | K    | Na    |
|----------------|----------|-----|-----|---------|-------|-----------|----|-------|-----|------|------|------|------|-------|
| 62             | 0        | 0   | 53  | 1       | 21.39 | 1         | 0  | 116.7 | 111 | 35   | 5.02 | 1.3  | 3.81 | 139.8 |
| 63             | 0        | 0   | 48  | 2       | 16.61 | 1         | 0  | 90    | 87  | 30.2 | 4.65 | 1.97 | 4.36 | 138.2 |
| 63             | 0        | 0   | 77  | 1       | 20.2  | 2         | 1  | 77    | 112 | 21.3 | 5.11 | 1.02 | 2.61 | 135.3 |
| 64             | 0        | 0   | 54  | 2       | 24.14 | 1         | 0  | 103.3 | 74  | 35.9 | 4.44 | 1.93 | 4.65 | 144.9 |
| 65             | 1        | 1   | 66  | 1       | 21.3  | 1         | 0  | 93.33 | 78  | 23.1 | 3.93 | 0.63 | 5.96 | 135.8 |
| 66             | 0        | 0   | 72  | 1       | 18.37 | 1         | 0  | 80.67 | 106 | 28.9 | 5.49 | 1.41 | 2.83 | 141   |
| 66             | 0        | 0   | 25  | 2       | 16.61 | 1         | 0  | 73.33 | 54  | 28.7 | 3.44 | 0.64 | 3.29 | 133.4 |
| 66             | 0        | 0   | 51  | 1       | 20.9  | 1         | 0  | 106.7 | 113 | 31.1 | 3.49 | 1.83 | 4.03 | 128.3 |
| 67             | 0        | 0   | 24  | 2       | 24.01 | 1         | 0  | 127   | 105 | 26   | 5.59 | 1.33 | 2.88 | 138   |
| 67             | 0        | 0   | 81  | 1       | 25.78 | 3         | 1  | 103.3 | 130 | 29.6 | 3.73 | 1.47 | 3.96 | 136.2 |
| 70             | 1        | 0   | 76  | 1       | 15.79 | 1         | 0  | 81.33 | 78  | 20.8 | 4.78 | 0.71 | 3.34 | 141   |
| 70             | 0        | 0   | 31  | 2       | 19.22 | 1         | 0  | 106.3 | 92  | 27.4 | 4.97 | 1.1  | 4.18 | 138.1 |
| 71             | 0        | 0   | 52  | 1       | 23.49 | 4         | 0  | 92    | 95  | 33.2 | 2.72 | 1.3  | 4.18 | 148.5 |
| 71             | 0        | 0   | 61  | 1       | 24.61 | 1         | 0  | 85.33 | 91  | 30.5 | 4.51 | 0.86 | 3.04 | 143.2 |
| 71             | 0        | 0   | 46  | 1       | 16.63 | 1         | 0  | 120   | 73  | 29.5 | 3.47 | 0.53 | 4.58 | 142.5 |
| 71             | 0        | 0   | 55  | 1       | 20.76 | 1         | 0  | 100   | 99  | 34.4 | 4.65 | 0.92 | 3.2  | 141.5 |
| 71             | 0        | 0   | 78  | 1       | 24.03 | 3         | 0  | 89    | 80  | 29.6 | 4.2  | 1.57 | 4.28 | 143.9 |
| 71             | 1        | 1   | 72  | 2       | 20.83 | 1         | 0  | 103.3 | 75  | 25.6 | 6.03 | 1.16 | 4.08 | 143.1 |
| 74             | 0        | 0   | 60  | 1       | 22.59 | 1         | 0  | 118   | 105 | 33.8 | 3.81 | 1.1  | 3.07 | 141.6 |
| 74             | 0        | 0   | 39  | 1       | 18.14 | 1         | 0  | 100   | 84  | 27.2 | 4.03 | 2.93 | 5.01 | 139.4 |
| 76             | 1        | 0   | 78  | 1       | 20.59 | 1         | 0  | 93.33 | 89  | 21.8 | 5.02 | 1.02 | 3.02 | 144.2 |
| 76             | 0        | 0   | 46  | 1       | 17.36 | 6         | 0  | 81    | 118 | 27.8 | 3.83 | 1.11 | 4.44 | 138.3 |
| 76             | 0        | 0   | 58  | 2       | 28.84 | 3         | 1  | 98.33 | 90  | 35.8 | 5.58 | 2.11 | 5.03 | 141.1 |
| 76             | 0        | 0   | 62  | 1       | 28.08 | 4         | 1  | 110   | 101 | 36.8 | 4.53 | 1.26 | 3.88 | 143.1 |
| 78             | 0        | 0   | 57  | 1       | 24.38 | 1         | 0  | 98.33 | 98  | 37.7 | 5.16 | 1.64 | 4.66 | 141.2 |
| 78             | 0        | 0   | 33  | 1       | 26.54 | 1         | 0  | 81.67 | 110 | 35.4 | 7.27 | 3.29 | 4.24 | 141.2 |
| 79             | 0        | 0   | 42  | 2       | 18.31 | 1         | 0  | 106   | 106 | 38.6 | 4.25 | 0.98 | 5.29 | 138.8 |
| 80             | 0        | 0   | 40  | 2       | 23.63 | 1         | 0  | 90    | 101 | 39.2 | 4.9  | 1.03 | 4.69 | 141.2 |
| 81             | 1        | 0   | 73  | 1       | 15.73 | 1         | 0  | 96.67 | 119 | 34.5 | 4.68 | 1.21 | 5.83 | 137.9 |
| 83             | 0        | 0   | 42  | 2       | 17.51 | 1         | 0  | 100.7 | 59  | 15.2 | 4.14 | 1.18 | 3.84 | 123.5 |
| 86             | 1        | 1   | 63  | 2       | 16.89 | 1         | 0  | 70    | 104 | 19   | 4.97 | 1.45 | 2.74 | 139.5 |
| 89             | 1        | 1   | 58  | 2       | 27.64 | 1         | 0  | 92.67 | 79  | 35.1 | 3.82 | 0.86 | 5.24 | 137.3 |
| 90             | 0        | 0   | 43  | 1       | 22.32 | 1         | 0  | 112   | 110 | 28.8 | 3.24 | 1.13 | 4.65 | 138.2 |
| 90             | 0        | 0   | 42  | 2       | 20.58 | 1         | 0  | 96.67 | 105 | 31.9 | 7.32 | 2.42 | 5.2  | 135.4 |
| 92             | 0        | 0   | 35  | 2       | 18.73 | 1         | 0  | 135   | 106 | 23.6 | 6.34 | 1.35 | 4.41 | 135.5 |
| 98             | 0        | 0   | 48  | 2       | 18.82 | 1         | 0  | 91.67 | 129 | 36.2 | 4.38 | 1.09 | 4.69 | 135.3 |
| 99             | 0        | 0   | 48  | 1       | 19.95 | 1         | 0  | 103.3 | 82  | 24.7 | 5.28 | 1.17 | 4.59 | 142.8 |
| 104            | 0        | 0   | 52  | 2       | 20.66 | 1         | 0  | 87.33 | 85  | 24.2 | 5.7  | 1.53 | 4.51 | 140.2 |
| 107            | 0        | 0   | 66  | 2       | 21.23 | 1         | 0  | 106.7 | 109 | 32   | 4.24 | 0.95 | 5.22 | 139.1 |
| 119            | 0        | 0   | 55  | 1       | 25.71 | 1         | 0  | 126   | 130 | 35.8 | 3.25 | 1.13 | 3.83 | 138.7 |
| 120            | 0        | 0   | 42  | 2       | 25.22 | 2         | 0  | 103.3 | 92  | 27.3 | 5.36 | 2.15 | 5.1  | 140.9 |

| Ca   | Mg   | mg l <sup>-</sup><br>year | P    | PTH   | urine<br>output | r-GFR | UF   | Ccr     | ACE/<br>ARB | Calcium<br>carbonate | Vitamin<br>D |
|------|------|---------------------------|------|-------|-----------------|-------|------|---------|-------------|----------------------|--------------|
| 1.22 | 0.69 | 0.69                      | 0.85 | 840.9 | 1000            | 5.65  | 300  | 49.28   | 1           | 1                    | 1            |
| 1.79 | 0.69 |                           | 1.44 | 172.4 | 800             | 6.74  | 615  | 55.25   | 1           | 1                    | 1            |
| 2.16 | 0.55 |                           | 0.68 | 402   | 100             | 5.69  | 500  | 42.97   | 0           | 1                    | 1            |
| 1.77 | 0.82 |                           | 1.44 | 274.9 | 2000            | 7.86  | 50   | 68.05   | 1           | 1                    | 1            |
| 2.16 | 0.91 |                           | 0.84 | 100.7 | 1300            | 4.33  | 40   | 53.45   | 1           | 1                    | 1            |
| 1.46 | 0.65 |                           | 1.13 | 85.7  | 600             | 7.22  | 500  | 64.73   | 0           | 1                    | 0            |
| 1.79 | 0.76 |                           | 0.9  | 405.7 | 1200            | 6.45  | -345 | 66.852  | 1           | 1                    | 0            |
| 2.05 | 0.92 |                           | 1.97 | 330.4 | 500             | 8.70  | 570  | 53.376  | 0           | 1                    | 1            |
| 1.69 | 0.65 |                           | 1.75 | 386.7 | 800             | 6.50  | 120  | 96.383  | 0           | 1                    | 0            |
| 1.5  | 0.78 |                           | 2.4  | 512.8 | 900             | 4.79  | 155  | 69.142  | 1           | 1                    | 0            |
| 1.79 | 0.99 |                           | 1.73 | 587.4 | 1400            | 6.75  | -15  | 68.02   | 1           | 1                    | 1            |
| 1.82 | 0.76 |                           | 0.92 | 333.1 | 750             | 13.48 | -140 | 82.093  | 1           | 1                    | 1            |
| 2.01 | 0.97 |                           | 1.9  | 575.5 | 1000            | 5.44  | 420  | 84.2    | 0           | 1                    | 0            |
| 2.02 | 0.7  |                           | 1.68 | 71.5  | 200             | 7.40  | 505  | 58.86   | 1           | 1                    | 1            |
| 2.03 | 0.79 |                           | 1.29 | 123.2 | 2220            | 8.65  | 10   | 126.088 | 1           | 1                    | 1            |
| 2.07 | 0.78 |                           | 0.97 | 92.6  | 700             | 11.78 | 100  | 140.01  | 1           | 1                    | 0            |
| 1.5  | 0.6  |                           | 1.42 | 309.8 | 1000            | 9.38  | 100  | 92.21   | 1           | 0                    | 0            |
| 1.67 | 0.83 |                           | 1.02 | 57.1  | 500             | 13.37 | 314  | 97.65   | 0           | 1                    | 1            |
| 1.88 | 0.75 |                           | 1.88 | 199.8 | 1100            | 6.11  | 0    | 59.022  | 1           | 0                    | 0            |
| 2.05 | 0.96 |                           | 1.41 | 204.8 | 1300            | 6.88  | -250 | 76.81   | 0           | 0                    | 0            |
| 2.06 | 0.88 |                           | 1.13 | 159.6 | 1200            | 9.25  | 30   | 174.797 | 0           | 0                    | 0            |
| 2.09 | 1.41 |                           | 1.41 | 37.5  | 1000            | 7.84  | 50   | 74.15   | 1           | 1                    | 0            |
| 2.15 | 0.75 |                           | 1.21 | 81.9  | 1100            | 9.55  | 110  | 86.64   | 1           | 1                    | 1            |
| 2.17 | 0.86 |                           | 1.36 | 65    | 2000            | 24.35 | -350 | 219.48  | 1           | 1                    | 0            |
| 1.3  | 0.67 |                           | 2.84 | 146.6 | 700             | 4.19  | 400  | 42.762  | 1           | 1                    | 1            |
| 1.82 | 0.75 |                           | 1.07 | 127.9 | 400             | 10.81 | 150  | 60.816  | 1           | 0                    | 0            |
| 1.82 | 0.83 |                           | 1.41 | 347.1 | 1700            | 10.31 | 250  | 60.71   | 1           | 1                    | 0            |
| 1.91 | 0.79 |                           | 0.98 | 221.3 | 900             | 11.65 | -145 | 129.37  | 1           | 1                    | 1            |
| 1.92 | 0.83 |                           | 1.64 | 676.6 | 1000            | 6.70  | 200  | 88.027  | 0           | 1                    | 1            |
| 1.51 | 0.67 |                           | 1.27 | 714.2 | 700             | 6.93  | -165 | 65.38   | 1           | 1                    | 1            |
| 1.8  | 0.64 |                           | 1.09 | 276.5 | 1200            | 5.22  | 125  | 62.45   | 0           | 0                    | 0            |
| 1.83 | 0.62 |                           | 1.04 | 142.1 | 900             | 22.14 | 100  | 109.35  | 1           | 0                    | 0            |
| 1.95 | 0.68 |                           | 1.15 | 135.4 | 700             | 7.32  | 415  | 89.95   | 1           | 0                    | 0            |
| 2.3  | 0.87 |                           | 1.33 | 95.7  | 700             | 6.79  | 355  | 86.47   | 1           | 0                    | 0            |
| 1.76 | 0.8  |                           | 2.46 | 255.4 | 900             | 2.70  | 250  | 48.8    | 1           | 1                    | 0            |
| 1.8  | 0.73 |                           | 1.31 | 78.3  | 1100            | 13.85 | 0    | 81.89   | 1           | 1                    | 0            |
| 2.1  | 0.9  |                           | 1.45 | 219.9 | 1200            | 5.76  | -100 | 66.23   | 0           | 1                    | 1            |
| 1.62 | 0.74 |                           | 0.92 | 114.3 | 300             | 9.04  | 405  | 38.47   | 1           | 1                    | 1            |
| 1.92 | 1.07 |                           | 1.51 | 247.4 | 1100            | 5.01  | 170  | 51      | 0           | 0                    | 1            |
| 1.98 | 0.81 |                           | 1.46 | 215.6 | 1500            | 12.94 | -245 | 101.36  | 1           | 0                    | 0            |
| 2.01 | 0.96 |                           | 1    | 207.7 | 2100            | 13.66 | 50   | 158.17  | 0           | 1                    | 0            |
| 2.07 | 0.76 |                           | 0.9  | 80.9  | 1200            | 13.03 | 55   | 80.94   | 1           | 1                    | 1            |
| 2.08 | 0.87 |                           | 1.65 | 283.9 | 1200            | 6.07  | 0    | 77.1    | 1           | 0                    | 0            |
| 2.21 | 0.85 |                           | 3.06 | 62.1  | 100             | 6.93  | 725  | 59.201  | 1           | 1                    | 0            |
| 1.89 | 0.54 | 0.65                      | 0.88 | 81.8  | 2000            | 7.86  | 130  | 31.15   | 1           | 1                    | 1            |
| 1.91 | 0.83 |                           | 1.05 | 730.4 | 1200            | 11.39 | 0    | 105.202 | 0           | 1                    | 1            |
| 1.94 | 0.99 | 0.97                      | 1.5  | 157   | 1000            | 6.21  | 160  | 38.25   | 1           | 1                    | 1            |
| 2.18 | 0.78 | 0.82                      | 1.24 | 474.9 | 1100            | 6.56  | 30   | 58.906  | 0           | 0                    | 1            |
| 2.25 | 0.83 | 0.78                      | 1.07 | 707.5 | 1000            | 8.74  | 100  | 102.12  | 0           | 0                    | 1            |
| 1.64 | 0.74 | 0.68                      | 0.93 | 441.7 | 700             | 6.58  | 350  | 82.24   | 1           | 1                    | 0            |
| 1.75 | 0.79 | 0.95                      | 3.07 | 344   | 400             | 3.44  | 190  | 33.66   | 1           | 1                    | 0            |
| 1.75 | 0.82 | 0.66                      | 1.07 | 288.5 | 500             | 7.01  | 195  | 61.81   | 1           | 1                    | 1            |
| 2    | 0.69 | 0.71                      | 2.67 | 127   | 1350            | 3.41  | -350 | 57.91   | 1           | 1                    | 1            |

| Ca   | Mg   | mg l <sup>-1</sup> -year | P    | PTH   | urine output | r-GFR | UF   | Ccr    | ACE/ARB | Calcium carbonate | Vitamin D |
|------|------|--------------------------|------|-------|--------------|-------|------|--------|---------|-------------------|-----------|
| 1.78 | 0.78 |                          | 1.5  | 349.4 | 1400         | 3.56  | 700  | 54.72  | 1       | 1                 | 1         |
| 1.83 | 0.83 | 1.06                     | 1.23 | 133   | 1300         | 5.27  | -210 | 66.28  | 1       | 1                 | 0         |
| 2.06 | 0.85 | 0.78                     | 1.82 | 235.7 | 1000         | 7.21  | 150  | 84.11  | 0       | 0                 | 1         |
| 1.3  | 0.54 | 0.61                     | 1.64 | 214.5 | 1000         | 6.33  | -105 | 63.46  | 1       | 1                 | 0         |
| 1.82 | 0.58 | 1.04                     | 1.66 | 457.6 | 700          | 9.66  | 410  | 102.26 | 1       | 1                 | 0         |
| 1.92 | 0.61 |                          | 1.21 | 55.7  | 1500         | 14.05 | -145 | 142.53 | 0       | 1                 | 0         |
| 1.68 | 0.71 | 0.91                     | 1.19 | 435.4 | 1000         | 6.50  | 10   | 86.21  | 1       | 1                 | 0         |
| 1.7  | 0.75 | 0.81                     | 2.31 | 802.5 | 900          | 4.53  | -95  | 69.11  | 0       | 1                 | 1         |
| 1.75 | 0.88 | 0.94                     | 1.18 | 382.6 | 1200         | 7.58  | 330  | 86.95  | 1       | 1                 | 1         |
| 1.78 | 1.04 | 1.09                     | 1.46 | 458   | 1800         | 5.10  | 200  | 66.099 | 1       | 1                 | 1         |
| 1.82 | 0.86 | 1.09                     | 1.83 | 476.2 | 1000         | 5.35  | -100 | 57.83  | 1       | 1                 | 0         |
| 1.92 | 0.84 | 0.83                     | 1.69 | 428.8 | 1100         | 6.72  | -20  | 96.08  | 0       | 1                 | 1         |
| 2.1  | 0.81 | 0.71                     | 1.66 | 111.6 | 1300         | 8.82  | -200 | 111.88 | 0       | 1                 | 0         |
| 2.13 | 0.74 | 0.81                     | 0.99 | 45.3  | 1400         | 15.00 | 25   | 50.49  | 1       | 0                 | 0         |
| 1.86 | 0.77 | 0.53                     | 1.32 | 156.7 | 400          | 8.68  | 220  | 87.714 | 1       | 1                 | 0         |
| 1.88 | 0.88 | 1.09                     | 1.11 | 260.1 | 1100         | 5.44  | 50   | 61.61  | 1       | 1                 | 0         |
| 1.9  | 0.72 | 0.87                     | 0.89 | 93    | 800          | 4.70  | -5   | 48.55  | 1       | 1                 | 1         |
| 1.91 | 0.77 | 0.74                     | 2.07 | 225.7 | 500          | 4.81  | 490  | 70.15  | 1       | 1                 | 0         |
| 2.6  | 1.12 | 0.8                      | 1.34 | 33.2  | 150          | 3.61  | 700  | 59.86  | 1       | 1                 | 0         |
| 1.94 | 0.63 | 0.69                     | 0.95 | 105.2 | 450          | 6.30  | 160  | 59.633 | 1       | 1                 | 0         |
| 2.01 | 0.68 | 0.99                     | 1.11 | 218.1 | 800          | 8.34  | 50   | 74.07  | 1       | 0                 | 0         |
| 2.13 | 0.69 | 0.64                     | 1.45 | 165.2 | 1000         | 5.47  | 200  | 65     | 1       | 0                 | 0         |
| 1.97 | 1.02 | 0.92                     | 2.25 | 396.6 | 900          | 4.46  | 560  | 30.05  | 1       | 0                 | 1         |
| 2.05 | 0.78 | 0.82                     | 1.11 | 104.6 | 400          | 3.21  | 550  | 62.39  | 1       | 1                 | 0         |
| 2.1  | 0.9  | 1.08                     | 1.03 | 130.5 | 1200         | 6.71  | -224 | 98.81  | 1       | 0                 | 0         |
| 2.12 | 1.25 | 1.19                     | 1.82 | 335.6 | 2330         | 5.73  | -400 | 62.06  | 0       | 1                 | 0         |
| 1.78 | 0.81 | 0.91                     | 1.23 | 189.1 | 1000         | 4.81  | 525  | 59.493 | 1       | 1                 | 0         |
| 1.85 | 0.91 | 0.52                     | 1.98 | 226.2 | 800          | 6.60  | 200  | 67.52  | 1       | 1                 | 0         |
| 2.01 | 0.9  | 0.73                     | 1.17 | 86.8  | 750          | 7.67  | -135 | 40.89  | 1       | 0                 | 1         |
| 2.09 | 0.75 | 0.64                     | 1.88 | 394   | 500          | 3.96  | 380  | 62.27  | 1       | 1                 | 0         |
| 1.62 | 0.68 | 0.78                     | 2.41 | 423   | 750          | 2.61  | 435  | 39.342 | 1       | 1                 | 1         |
| 1.78 | 0.78 | 0.84                     | 1.82 | 609.9 | 2000         | 3.65  | 180  | 77.003 | 1       | 0                 | 1         |
| 1.9  | 0.71 | 0.71                     | 0.78 | 28.2  | 700          | 7.28  | 295  | 65.111 | 1       | 1                 | 0         |
| 2.19 | 0.74 | 0.82                     | 1.21 | 239   | 2100         | 10.06 | 0    | 131.89 | 1       | 0                 | 1         |
| 2.36 | 0.87 | 0.69                     | 0.89 | 8.1   | 900          | 7.23  | -84  | 63.68  | 1       | 1                 | 1         |
| 1.83 | 0.92 | 0.83                     | 1.35 | 152.3 | 1500         | 8.72  | 15   | 100.13 | 1       | 1                 | 1         |
| 1.92 | 0.71 | 0.6                      | 1.27 | 605.1 | 600          | 0.30  | -150 | 40.51  | 1       | 1                 | 1         |
| 1.92 | 0.72 | 0.76                     | 0.95 | 103.3 | 1900         | 14.33 | -340 | 349.89 | 1       | 1                 | 1         |
| 1.96 | 1.02 | 0.79                     | 1.38 | 246   | 1200         | 13.33 | 75   | 70.49  | 0       | 1                 | 0         |
| 1.98 | 0.87 | 0.81                     | 1.24 | 551.3 | 1200         | 11.56 | 65   | 143.93 | 0       | 1                 | 0         |
| 2.07 | 0.72 | 0.77                     | 1.24 | 586.3 | 1500         | 6.31  | -300 | 85.07  | 0       | 1                 | 1         |
| 2.07 | 0.9  | 0.86                     | 1.77 | 183.1 | 2000         | 6.37  | 40   | 101.91 | 1       | 1                 | 1         |
| 2.17 | 0.98 | 1                        | 1.02 | 111.4 | 900          | 5.46  | 0    | 57.06  | 1       | 1                 | 1         |
| 1.78 | 0.75 | 0.66                     | 1.23 | 511.2 | 1600         | 8.62  | -265 | 94.89  | 0       | 0                 | 1         |
| 1.8  | 0.89 | 0.89                     | 1.04 | 423.5 | 1600         | 11.00 | 700  | 90.39  | 1       | 1                 | 1         |
| 1.92 | 0.71 | 0.7                      | 1.28 | 231.5 | 1550         | 6.61  | -70  | 81.87  | 1       | 1                 | 1         |
| 1.91 | 0.83 | 0.9                      | 1.49 | 349.9 | 1000         | 3.31  | 30   | 51.888 | 1       | 1                 | 0         |
| 2.02 | 0.75 | 0.61                     | 1.37 | 234.9 | 1550         | 3.97  | 70   | 79.08  | 1       | 1                 | 0         |
| 2.1  | 0.89 | 0.81                     | 1.53 | 498.5 | 1350         | 11.33 | 300  | 42.07  | 1       | 0                 | 0         |
| 2.21 | 0.9  | #N/A                     | 1.76 | 110.6 | 1250         | 7.63  | -30  | 97.97  | 1       | 1                 | 0         |
| 1.74 | 0.74 | 0.86                     | 1.34 | 449   | 2000         | 7.29  | 10   | 86.4   | 0       | 2                 | 0         |
| 1.85 | 0.79 | 0.7                      | 0.77 | 278.2 | 1500         | 6.96  | 130  | 65.53  | 1       | 1                 | 1         |
| 1.87 | 0.75 | 0.75                     | 2.24 | 496   | 300          | 3.77  | 500  | 55     | 1       | 1                 | 1         |

| Ca   | Mg   | mg l <sup>-1</sup> -year | P    | PTH   | urine output | r-GFR | UF   | Ccr     | ACE/ARB | Calcium carbonate | Vitamin D |
|------|------|--------------------------|------|-------|--------------|-------|------|---------|---------|-------------------|-----------|
| 1.89 | 0.93 | 1.05                     | 1.66 | 293.5 | 1200         | 5.56  | 50   | 85.83   | 0       | 1                 | 0         |
| 1.92 | 0.96 | 0.81                     | 1    | 4     | 1200         | 19.75 | 800  | 110.519 | 1       | 0                 | 0         |
| 2.16 | 0.78 | 0.75                     | 1.13 | 82.3  | 900          | 6.50  | -25  | 97.722  | 1       | 0                 | 0         |
| 1.95 | 1.25 | 0.92                     | 1.25 | 165.1 | 1400         | 7.25  | 30   | 66.628  | 1       | 0                 | 0         |
| 2    | 1.24 | 0.52                     | 1.65 | 152.4 | 800          | 5.46  | 60   | 43.66   | 1       | 1                 | 0         |
| 2.02 | 1.29 | 1.03                     | 1.09 | 225.1 | 1500         | 9.06  | 500  | 166.647 | 0       | 0                 | 0         |
| 2.03 | 0.92 | 0.82                     | 1.99 | 267.2 | 1500         | 4.39  | -50  | 50.86   | 1       | 1                 | 1         |
| 2.18 | 0.89 | 0.77                     | 1.41 | 42.8  | 1100         | 5.48  | 480  | 77.08   | 1       | 1                 | 0         |
| 2.79 | 0.85 | 0.64                     | 1.28 | 16.3  | 1200         | 4.91  | -90  | 100.36  | 0       | 0                 | 0         |
| 1.7  | 1    | 0.95                     | 2.32 | 767.6 | 250          | 5.49  | 390  | 45.455  | 0       | 1                 | 0         |
| 1.86 | 1    | 0.92                     | 2.09 | 469.9 | 2300         | 6.18  | 540  | 117.12  | 1       | 1                 | 1         |
| 1.89 | 0.73 | 0.67                     | 1.89 | 460.3 | 1000         | 12.43 | 350  | 75.54   | 1       | 1                 | 1         |
| 1.9  | 0.83 | 0.65                     | 0.54 | 217.5 | 2100         | 6.48  | 35   | 67.5    | 1       | 1                 | 1         |
| 2.12 | 0.86 |                          | 2.24 | 206.7 | 700          | 7.36  | 480  | 57.469  | 1       | 0                 | 1         |
| 2.19 | 0.87 | 0.69                     | 1.35 | 48.9  | 800          | 6.27  | 190  | 46.545  | 1       | 1                 | 1         |
| 2.03 | 0.63 | 0.79                     | 1.48 | 103.9 | 1800         | 12.36 | -250 | 40.31   | 1       | 0                 | 1         |
| 2.03 | 0.68 | 0.78                     | 1.48 | 103.5 | 1000         | 7.68  | -90  | 103.1   | 1       | 1                 | 0         |
| 1.78 | 0.78 | 0.69                     | 1.06 | 97    | 650          | 8.21  | 200  | 51.363  | 1       | 1                 | 0         |
| 1.83 | 0.82 | 0.94                     | 1.94 | 376.4 | 1350         | 9.90  | 0    | 107.66  | 0       | 0                 | 0         |
| 1.67 | 0.86 | 0.71                     | 2.25 | 400.8 | 1100         | 5.61  | 100  | 75.95   | 0       | 1                 | 0         |
| 1.81 | 0.92 | 0.81                     | 0.7  | 139.1 | 1350         | 7.45  | 125  | 84.65   | 0       | 1                 | 0         |
| 1.91 | 0.79 |                          | 0.98 | 95.1  | 1200         | 13.23 | 50   | 104.29  | 1       | 1                 | 0         |
| 1.72 | 0.59 | 0.66                     | 1.32 | 219.1 | 1600         | 7.47  | 175  | 102.44  | 1       | 1                 | 1         |
| 2.09 | 0.68 | 0.99                     | 1.2  | 208   | 800          | 6.09  | 80   | 75.84   | 1       | 1                 | 1         |
| 1.57 | 0.99 | 1.04                     | 2.33 | 345.4 | 800          | 3.59  | 250  | 51.17   | 1       | 1                 | 0         |
| 1.84 | 0.8  | 0.87                     | 1.11 | 286.4 | 1850         | 8.01  | 236  | 87.95   | 1       | 1                 | 1         |
| 1.94 | 0.7  | 0.75                     | 1.44 | 252.5 | 800          | 5.51  | 300  | 58.734  | 1       | 0                 | 1         |
| 1.97 | 0.76 | 0.86                     | 1.19 | 147.4 | 1400         | 7.12  | -130 | 57.41   | 1       | 1                 | 1         |
| 1.72 | 0.64 | 0.87                     | 1.36 | 352   | 1300         | 5.27  | 35   | 70.456  | 1       | 1                 | 0         |
| 2.01 | 0.75 | 0.82                     | 1.08 | 122.9 | 1100         | 9.54  | -200 | 75.07   | 1       | 1                 | 1         |
| 1.62 | 0.78 | 0.96                     | 2.27 | 422   | 400          | 7.16  | -320 | 76.53   | 1       | 1                 | 1         |
| 1.71 | 0.89 | 0.96                     | 0.84 | 418.8 | 300          | 6.95  | 85   | 66.24   | 0       | 1                 | 1         |
| 1.89 | 1    |                          | 0.29 | 43.9  | 150          | 22.65 | 330  | 68.68   | 1       | 0                 | 0         |
| 2.03 | 1.08 | 0.91                     | 1.51 | 371.7 | 500          | 7.52  | 350  | 74.423  | 0       | 1                 | 0         |
| 2.06 | 0.96 | 0.69                     | 0.79 | 280.5 | 1300         | 6.46  | -330 | 68.89   | 1       | 1                 | 0         |
| 2.09 | 0.74 | 0.89                     | 0.74 | 147.3 | 1200         | 24.70 | 150  | 146.09  | 0       | 0                 | 0         |
| 1.77 | 0.86 | 0.9                      | 1.42 | 249.8 | 500          | 4.83  | 415  | 66.645  | 1       | 0                 | 0         |
| 1.96 | 1.29 | 0.95                     | 1.35 | 248.6 | 1050         | 4.27  | -90  | 49.46   | 1       | 1                 | 1         |
| 2.27 | 0.81 | 0.82                     | 0.98 | 66.1  | 1200         | 10.47 | -80  | 80.25   | 1       | 1                 | 1         |
| 1.92 | 0.87 |                          | 1.09 | 229   | 1200         | 9.38  | 100  | 87.66   | 1       | 1                 | 0         |
| 2.34 | 0.74 | 0.81                     | 2.06 | 111.2 | 150          | 3.36  | 1345 | 38.47   | 1       | 1                 | 1         |
| 1.92 | 1.04 | 0.81                     | 1.57 | 687.3 | 800          | 6.01  | 300  | 55.15   | 1       | 1                 | 0         |
| 1.96 | 0.87 | 0.95                     | 2.27 | 183.2 | 1300         | 4.10  | 640  | 45.76   | 0       | 0                 | 0         |
| 2.01 | 0.69 | 0.7                      | 0.9  | 125.2 | 900          | 6.59  | 500  | 72.667  | 1       | 1                 | 0         |
| 1.76 | 1.04 | 0.84                     | 0.86 | 191   | 900          | 5.41  | -90  | 83.25   | 1       | 1                 | 1         |
| 1.87 | 0.79 | 0.9                      | 1.95 | 730.8 | 700          | 5.46  | 315  | 83.89   | 0       | 1                 | 0         |
| 2.28 | 1.16 | 1                        | 1.22 | 164.8 | 1150         | 8.32  | 475  | 88.5    | 1       | 1                 | 1         |
| 2.35 | 0.78 | 0.81                     | 2.32 | 623.8 | 1400         | 5.73  | -190 | 67.44   | 1       | 1                 | 1         |
| 1.78 | 2.28 | 0.8                      | 2.28 | 612.3 | 800          | 4.36  | 50   | 59.23   | 0       | 1                 | 0         |
| 2.19 | 1    | 1.27                     | 1.48 | 520   | 500          | 5.12  | 200  | 47.637  | 1       | 0                 | 0         |
| 2.33 | 1.09 |                          | 1.4  | 54.2  | 1050         | 5.59  | 1120 | 64.63   | 1       | 1                 | 1         |
| 1.71 | 0.73 | 0.69                     | 1.56 | 39.9  | 1600         | 4.73  | -5   | 64.79   | 1       | 1                 | 1         |
| 1.85 | 0.71 | 0.81                     | 1    | 182.1 | 700          | 7.84  | 480  | 71.21   | 1       | 1                 | 1         |



| Ca   | Mg   | mg l <sup>-1</sup> -year | P    | PTH   | urine output | r-GFR | UF   | Ccr     | ACE/ARB | Calcium carbonate | Vitamin D |
|------|------|--------------------------|------|-------|--------------|-------|------|---------|---------|-------------------|-----------|
| 2.03 | 0.73 | 0.69                     | 1.78 | 112.1 | 1450         | 6.19  | -112 | 87.36   | 1       | 1                 | 1         |
| 2.18 | 1    | 0.83                     | 1.57 | 139.9 | 600          | 5.23  | 125  | 60.07   | 0       | 1                 | 0         |
| 1.95 | 0.78 | 0.82                     | 1.01 | 152.3 | 400          | 8.93  | 180  | 52.61   | 1       | 0                 | 0         |
| 2.08 | 0.93 | 0.85                     | 1.76 | 526.1 | 1100         | 8.26  | 450  | 92.068  | 1       | 1                 | 0         |
| 2.12 | 1.03 | 1.03                     | 1.28 | 282.3 | 390          | 5.19  | 980  | 55.15   | 1       | 1                 | 1         |
| 2.26 | 1.02 | 0.95                     | 2.11 | 200.3 | 1300         | 6.21  | 420  | 105.61  | 0       | 1                 | 0         |
| 2.02 | 0.54 |                          | 1.27 | 65.1  | 1850         | 5.09  | 245  | 54.851  | 0       | 0                 | 0         |
| 2.29 | 0.93 | 0.82                     | 1.61 | 105.2 | 1100         | 13.13 | -125 | 61.9    | 1       | 1                 | 1         |
| 1.81 | 1.05 | 0.75                     | 1.09 | 94.7  | 650          | 5.14  | -90  | 49.687  | 1       | 1                 | 1         |
| 1.89 | 0.78 | 0.84                     | 1.57 | 311.3 | 1200         | 4.83  | 410  | 66.42   | 1       | 1                 | 1         |
| 2.06 | 0.81 | 0.93                     | 1.51 | 177.5 | 1800         | 14.07 | 75   | 142.05  | 1       | 0                 | 0         |
| 2.2  | 0.87 | 0.82                     | 1.02 | 279   | 1000         | 4.07  | 200  | 48.32   | 1       | 0                 | 1         |
| 1.75 | 0.84 | 0.64                     | 1.58 | 224   | 1300         | 5.03  | 150  | 48.08   | 1       | 1                 | 1         |
| 2.01 | 0.84 | 0.84                     | 1.18 | 93.5  | 800          | 15.67 | 350  | 58.54   | 1       | 0                 | 0         |
| 1.86 | 0.92 | 0.88                     | 1.86 | 326   | 3000         | 12.06 | -250 | 144.11  | 1       | 1                 | 1         |
| 1.87 | 1.24 |                          | 1.12 | 372.6 | 1200         | 10.21 | 210  | 72.92   | 1       | 0                 | 1         |
| 1.88 | 0.82 | 0.68                     | 1.38 | 296.4 | 1150         | 6.05  | -55  | 77.42   | 1       | 0                 | 0         |
| 2.2  | 0.98 | 0.82                     | 2.13 | 73    | 600          | 4.70  | 1200 | 65.16   | 1       | 1                 | 1         |
| 2.21 | 1.17 | 1.05                     | 1.17 | 119.2 | 1300         | 9.49  | -400 | 109.36  | 1       | 1                 | 1         |
| 1.73 | 0.65 | 0.65                     | 1.2  | 323.7 | 500          | 6.24  | 200  | 65.91   | 1       | 0                 | 0         |
| 1.89 | 1    | 1.1                      | 0.83 | 263.2 | 800          | 10.25 | 200  | 69.39   | 1       | 1                 | 1         |
| 1.92 | 0.87 | 0.96                     | 1.35 | 227.2 | 1500         | 6.80  | -10  | 91.67   | 1       | 1                 | 1         |
| 1.94 | 0.85 | 0.78                     | 1.14 | 105.4 | 1200         | 7.04  | 400  | 493.898 | 0       | 0                 | 0         |
| 2    | 0.85 | 0.84                     | 1.67 | 300   | 2000         | 7.64  | -205 | 96.69   | 1       | 1                 | 1         |
| 2.16 | 0.71 | 0.69                     | 1.19 | 103.9 | 1500         | 10.08 | 0    | 100.56  | 0       | 1                 | 1         |
| 1.78 | 0.69 | 0.91                     | 1.37 | 334.5 | 1100         | 8.01  | 100  | 61.056  | 1       | 1                 | 1         |
| 1.66 | 0.75 | 1.01                     | 1.36 | 449.2 | 1100         | 6.98  | 355  | 104.1   | 1       | 1                 | 1         |
| 2.2  | 1.12 | 0.97                     | 1.65 | 143   | 700          | 5.41  | 480  | 75.29   | 0       | 0                 | 0         |
| 2.29 | 0.69 | 0.9                      | 1.45 | 140.2 | 550          | 16.53 | 100  | 107.58  | 1       | 1                 | 1         |
| 1.74 | 1.02 | 1.28                     | 2.72 | 445.4 | 750          | 2.15  | 1000 | 50.535  | 0       | 0                 | 1         |
| 2.19 | 0.91 | 1.11                     | 1.26 | 102.2 | 1200         | 12.67 | 400  | 131.489 | 1       | 1                 | 0         |
| 1.86 | 0.96 | 0.96                     | 1.54 | 252.8 | 1400         | 5.80  | 300  | 93.398  | 0       | 0                 | 1         |
| 2.23 | 1.05 | 0.59                     | 1.75 | 216.6 | 900          | 7.97  | 240  | 143.073 | 0       | 0                 | 1         |
| 2.33 | 0.96 | 0.97                     | 1.38 | 42.8  | 2000         | 18.17 | -615 | 211.28  | 1       | 1                 | 1         |
| 1.98 | 0.84 | 0.96                     | 1.51 | 301.1 | 1625         | 6.49  | -10  | 86.12   | 1       | 1                 | 1         |
| 1.98 | 0.91 | 0.87                     | 1.3  | 133.8 | 1000         | 22.23 | 200  | 234.487 | 1       | 0                 | 0         |
| 2.04 | 0.81 |                          | 1.12 | 206.8 | 600          | 5.56  | 110  | 50.05   | 1       | 1                 | 1         |
| 1.69 | 0.65 |                          | 1.08 | 293.6 | 500          | 6.45  | 500  | 56.015  | 1       | 1                 | 0         |
| 1.52 | 1.03 | 0.92                     | 2.22 | 830.5 | 800          | 3.57  | 250  | 52.8    | 0       | 0                 | 1         |
| 2.26 | 1.05 | 1.08                     | 1.85 | 90.7  | 200          | 6.87  | 0    | 74.53   | 1       | 1                 | 1         |
| 2.55 | 1.7  | 1.7                      | 1.97 | 15.3  | 700          | 4.85  | 200  | 46.835  | 0       | 0                 | 0         |
| 2.18 | 1.08 | 0.96                     | 0.83 | 312.2 | 1650         | 10.05 | -200 | 97.88   | 1       | 1                 | 1         |
| 3.42 | 1.32 | 0.76                     | 1.27 | 19    | 1650         | 6.02  | 250  | 55.54   | 1       | 1                 | 1         |
| 1.97 | 0.68 | 0.68                     | 1.55 | 298.8 | 700          | 4.87  | 445  | 50.28   | 1       | 1                 | 1         |
| 2.1  | 0.91 | 0.8                      | 1.15 | 132.8 | 1250         | 13.29 | 0    | 68.736  | 0       | 0                 | 0         |
| 2.34 | 0.77 | 0.87                     | 1.3  | 118.5 | 1350         | 4.67  | 540  | 70.44   | 1       | 1                 | 1         |
| 2.14 | 0.96 | 0.98                     | 0.96 | 83.9  | 1400         | 12.42 | 315  | 113.7   | 1       | 1                 | 1         |
| 2.19 | 0.86 | 1.16                     | 1.49 | 245   | 700          | 4.38  | 480  | 67.202  | 0       | 0                 | 1         |
| 2.05 | 0.77 | 0.9                      | 1    | 22.6  | 700          | 8.39  | 610  | 59.042  | 1       | 1                 | 0         |
| 2.1  | 0.99 | 0.95                     | 1.41 | 87.5  | 3100         | 6.34  | -375 | 106.92  | 1       | 1                 | 1         |
| 2.3  | 0.89 | 1.02                     | 0.98 | 4     | 2150         | 11.74 | 85   | 92.27   | 1       | 1                 | 1         |
| 2.08 | 1.19 | #N/A                     | 3.69 | 502.7 | 2000         | 3.89  | 450  | 73      | 1       | 0                 | 1         |
| 2.13 | 1.02 | 0.97                     | 1.53 | 271.9 | 2600         | 7.64  | -50  | 106.78  | 1       | 1                 | 1         |

| Ca   | Mg   | mg l <sup>-1</sup> -year | P    | PTH    | urine output | r-GFR | UF   | Ccr     | ACE/ARB | Calcium carbonate | Vitamin D |
|------|------|--------------------------|------|--------|--------------|-------|------|---------|---------|-------------------|-----------|
| 2.23 | 0.81 | 0.9                      | 1.4  | 322.7  | 2500         | 8.81  | -530 | 103.92  | 1       | 1                 | 1         |
| 1.91 | 0.96 | 1.07                     | 1.55 | 473.2  | 1500         | 7.34  | 220  | 72.64   | 1       | 0                 | 1         |
| 2.26 | 0.73 | 0.93                     | 1.18 | 22.7   | 1100         | 12.59 | 256  | 128.11  | 1       | 1                 | 1         |
| 2.22 | 0.95 | 0.66                     | 1.71 | 86.9   | 1160         | 4.42  | -400 | 74.16   | 1       | 1                 | 1         |
| 1.84 | 0.75 | 0.93                     | 1.45 | 339    | 1500         | 5.08  | 0    | 61.925  | 0       | 0                 | 0         |
| 2.02 | 1.03 | 0.84                     | 1.12 | 128.8  | 600          | 11.79 | 305  | 94.88   | 0       | 0                 | 0         |
| 2.05 | 0.95 | 1.02                     | 1.64 | 168.1  | 500          | 8.08  | 200  | 87.52   | 0       | 1                 | 1         |
| 2.27 | 1.02 | 1.02                     | 1.22 | 62.8   | 1500         | 6.81  | 300  | 51.078  | 0       | 0                 | 0         |
| 2.09 | 0.86 |                          | 1.68 | 140.4  | 825          | 6.54  | 410  | 60.53   | 1       | 1                 | 0         |
| 2.15 | 1.17 | 1.06                     | 1.46 | 356    | 900          | 7.34  | 450  | 94.86   | 1       | 1                 | 1         |
| 1.97 | 1    | 0.71                     | 1.46 | 177.5  | 400          | 6.72  | 600  | 56.46   | 1       | 1                 | 0         |
| 2.29 | 0.84 | 1.09                     | 1.89 | 44.4   | 1000         | 7.16  | 0    | 51.41   | 1       | 1                 | 1         |
| 1.64 | 0.8  | 0.82                     | 1.44 | 345.5  | 1500         | 13.57 | 0    | 166     | 1       | 1                 | 1         |
| 2.06 | 0.92 | 1.21                     | 1.34 | 265.5  | 1550         | 6.10  | 200  | 74.63   | 1       | 1                 | 1         |
| 2.06 | 1.02 | 1.27                     | 1.62 | 202.1  | 500          | 5.69  | 500  | 41.17   | 1       | 0                 | 1         |
| 2.18 | 0.97 | 0.99                     | 1.35 | 195.5  | 1500         | 13.52 | 635  | 139.968 | 1       | 0                 | 0         |
| 2.18 | 1.03 | 0.91                     | 1.24 | 125.3  | 1500         | 8.53  | 65   | 73.16   | 1       | 1                 | 1         |
| 2.3  | 0.76 | 0.91                     | 1.33 | 145    | 950          | 4.65  | 600  | 74.13   | 1       | 1                 | 1         |
| 2    | 0.65 | 0.88                     | 1.23 | 556.1  | 2000         | 7.96  | -300 | 67.15   | 1       | 1                 | 1         |
| 2    | 1.02 | 1.11                     | 1.59 | 610.4  | 700          | 4.65  | 350  | 49.905  | 1       | 1                 | 0         |
| 2.25 | 0.65 | 0.85                     | 1.24 | 13.4   | 400          | 6.25  | -265 | 52.039  | 0       | 0                 | 0         |
| 2.03 | 0.83 | 0.64                     | 1.24 | 594.3  | 1500         | 6.73  | 100  | 59.11   | 1       | 1                 | 1         |
| 2.22 | 1.08 | 1.82                     | 2    | 673.2  | 1200         | 8.48  | 250  | 84.7    | 1       | 1                 | 1         |
| 2.25 | 0.88 | 0.95                     | 1.65 | 149.6  | 1500         | 10.96 | 400  | 85.54   | 0       | 1                 | 1         |
| 2.03 | 0.89 | 0.95                     | 1.54 | 326    | 1330         | 5.31  | 1240 | 71.87   | 1       | 0                 | 0         |
| 2.27 | 0.85 | 1.09                     | 1.62 | 127.8  | 1000         | 8.33  | 100  | 94.14   | 1       | 1                 | 1         |
| 2.09 | 1.01 | 0.72                     | 1.17 | 982.7  | 2150         | 3.63  | 0    | 73.37   | 1       | 1                 | 1         |
| 2.16 | 1.11 | 0.86                     | 1.35 | 140    | 1200         | 6.21  | 215  | 88.87   | 1       | 0                 | 1         |
| 2.2  | 0.79 | 1.04                     | 1.44 | 110    | 1500         | 8.15  | 100  | 62.016  | 1       | 1                 | 0         |
| 1.76 | 0.98 | 1.08                     | 1.37 | 60.4   | 100          | 4.64  | 1400 | 67.39   | 1       | 0                 | 1         |
| 2.37 | 0.67 | 0.85                     | 0.42 | 260.9  | 800          | 6.27  | 50   | 71.06   | 0       | 1                 | 1         |
| 2.03 | 0.68 | 1.06                     | 1.21 | 582    | 1700         | 5.69  | -20  | 71.89   | 1       | 1                 | 1         |
| 2.24 | 1.03 | 0.98                     | 1.59 | 234    | 2000         | 9.03  | 300  | 116.57  | 1       | 0                 | 1         |
| 2.29 | 1.13 | 0.8                      | 1.42 | 367.3  | 550          | 3.42  | 400  | 41.82   | 1       | 1                 | 1         |
| 2.09 | 1.13 | 1.06                     | 1.25 | 726.5  | 1100         | 4.61  | 0    | 100.69  | 1       | 0                 | 1         |
| 2.11 | 0.81 | 0.62                     | 1.95 | 1611.3 | 600          | 3.19  | 500  | 62      | 0       | 1                 | 1         |
| 1.89 | 1.09 | 0.73                     | 1.52 | 243.3  | 700          | 4.27  | 100  | 37.6    | 1       | 1                 | 1         |
| 1.9  | 1.22 | 1.36                     | 2.28 | 451.4  | 700          | 2.92  | 214  | 55.164  | 1       | 1                 | 1         |
| 2.12 | 1.11 | 0.68                     | 1.49 | 406.4  | 900          | 3.42  | 0    | 35.695  | 1       | 1                 | 1         |
| 1.36 | 0.79 | 0.81                     | 1.2  | 73     | 1800         | 9.97  | -100 | 105.89  | 1       | 1                 | 1         |
| 2.1  | 0.73 | 0.73                     | 1.4  | 442.4  | 1100         | 6.4   | 1595 | 48.11   | 1       | 1                 | 0         |
